# Supplementary material for: A highly bioactive and biodegradable poly(glycerol sebacate)–silica glass hybrid elastomer with tailored mechanical properties for bone tissue regeneration
Source: Royal Society of Chemistry journal article supplement (doi:10.1039/c4tb01693a), 2015-01-01
Supplement: c4tb01693a1.pdf [file c4tb01693a1.pdf]

## Supporting Information

### **A highly bioactive and biodegradable poly (glycerol sebacate)-silica glass hybrid elastomer with tailored mechanical properties for bone tissue regeneration**

Xin Zhao<sup>a</sup>, Yaobin Wu <sup>a</sup>, Yuzhang Du<sup>a</sup>, Xiaofeng Chen <sup>c</sup>, Bo Lei <sup>a, c\*</sup>, Yumeng Xue <sup>a</sup>, Peter X Ma <sup>a, b, d, e, f\*</sup>,

<sup>a</sup> *Frontier Institute of Science and Technology, Xi'an Jiaotong University, Xi'an, China*

<sup>b</sup> *Department of Biologic and Materials Sciences, The University of Michigan, Ann Arbor, USA*

<sup>c</sup> *National Engineering Research Center for Tissue Restoration and Reconstruction, Guangzhou, China*

<sup>d</sup> *Department of Biomedical Engineering, University of Michigan, Ann Arbor, USA*

<sup>e</sup> *Macromolecular Science and Engineering Center, University of Michigan, Ann Arbor, USA*

<sup>f</sup> *Department of Materials Science and Engineering, University of Michigan, Ann Arbor, USA*

\*Corresponding author:

*B Lei, rayboo@xjtu.edu.cn or leiboaray@gmail.com, Tel. +86-29-83395361*

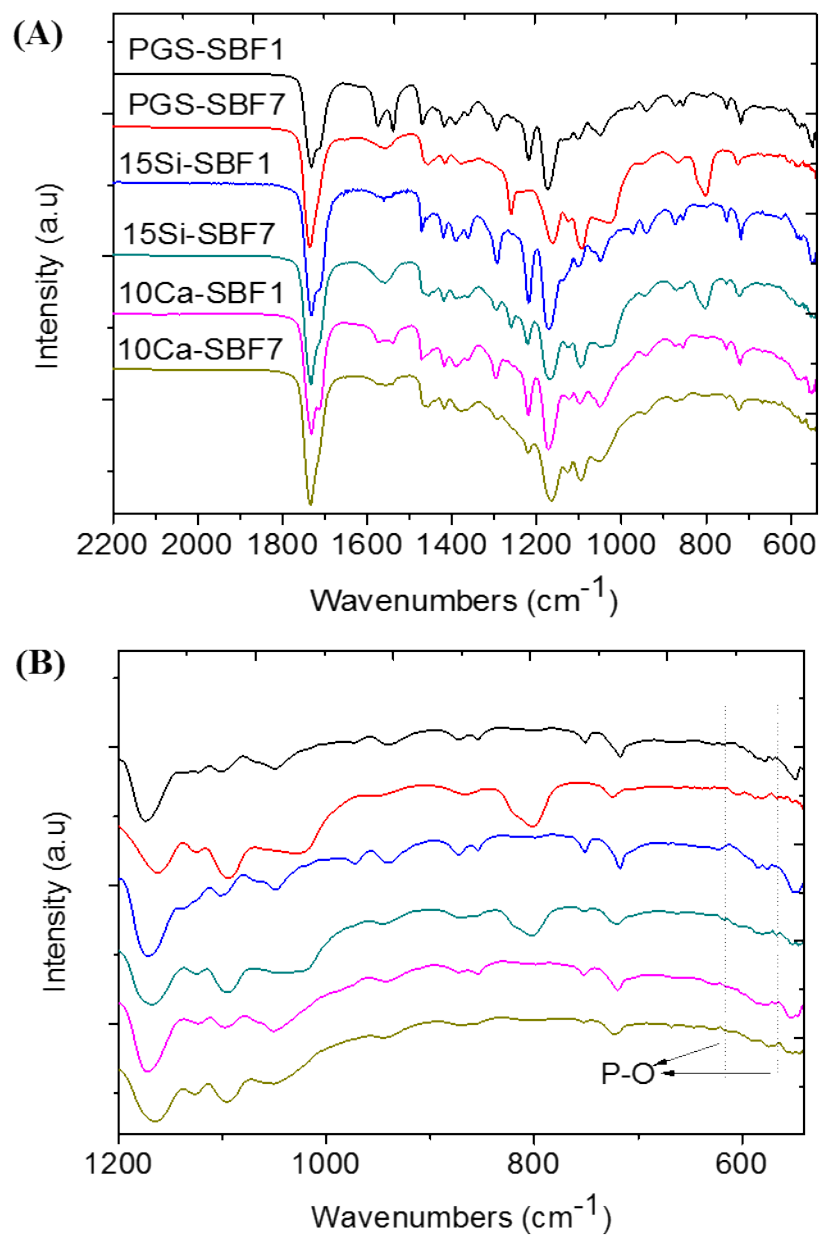

**Figure S1.** FTIR spectra of samples after soaking in SBF for 1 and 7days.
